# Supplementary material for: Silver(i) dithiocarboxylate complexes – clustering and aggregation
Source: Royal Society of Chemistry journal article supplement (doi:10.1039/c8dt00279g), 2018-01-01

Supplementary Information

**Silver(I) Dithiocarboxylate Complexes – Clustering and Aggregation**

Johanna Grote, Beate Neumann, Hans-Georg Stammler and Norbert W. Mitzel\*

*Dalton Trans.*

**Powder X-Ray Diffractogram of [Ag-S(S)CMe]<sub>2</sub>**

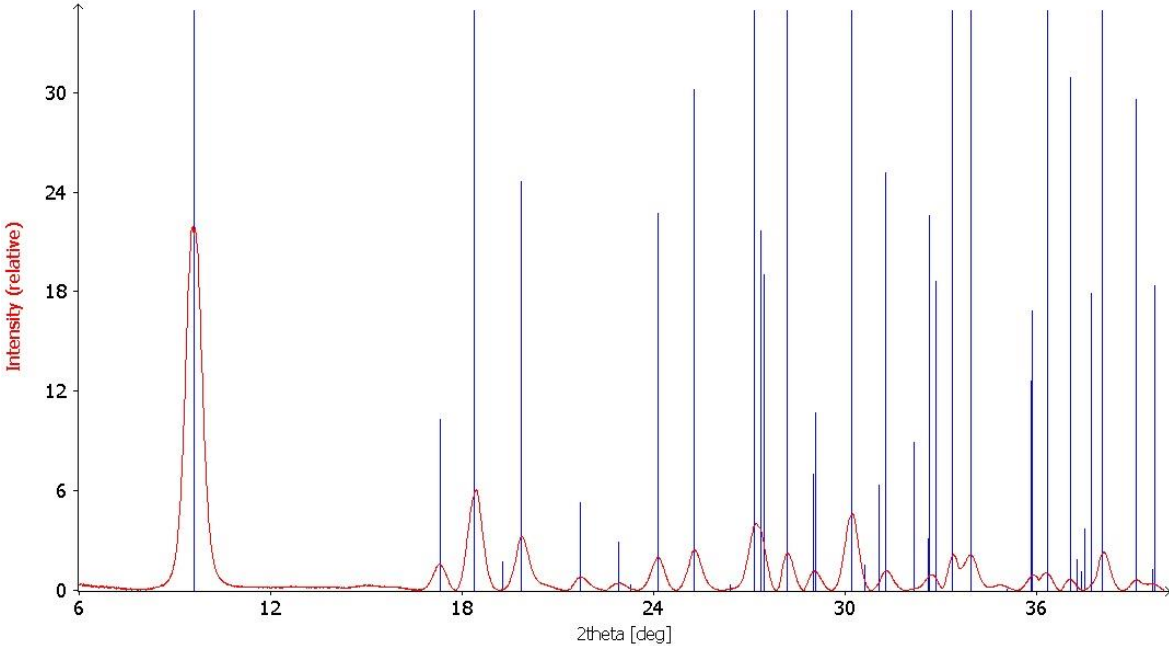

Supplement: c8dt00279g1.pdf [file c8dt00279g1.pdf]
